# Supplementary material for: Effects of monofilament nylon versus braided multifilament nylon gangions on catch rates of Greenland shark (Somniosus microcephalus) in bottom set longlines
Source: PeerJ. 2020 Dec 3;8:e10407. doi: 10.7717/peerj.10407 (PMC7719291; doi:10.7717/peerj.10407)
Supplement: Supplemental Information 1 — The body size categories, sex, health status, mode of capture, number of hooks entangled, and time required to disentangle sharks is shown. [file peerj-08-10407-s001.xlsx]

## Sheet: Sheet1
NUMBER	Set	Soak_time	depth	date_hauled	Gear	Gear code	Tangled	TANGLE CODE	NUMBER	Set	# hooks TANGLED	jaw hook	#hooks in jaw	time DISENTANGLE	TIME RESUME	NUMBER	Set	size	size code	sex	Damage	Cannibalize	NOTES
1	3	12.75	708	2018-08-22	E-91M	2	Y	1	1	3	2	Y	1	2	2	1	3	<3	1	F	N	N
2	3	12.75	708	2018-08-22	C-91BN	1	N	0	2	3	0	Y	1	0	0	2	3	3 to 4	2	M	N	N
3	3	12.75	708	2018-08-22	SURVEY	3	Y	1	3	3	3	Y	2	3	2	3	3	3 to 4	2	F	N	N
4	3	12.75	708	2018-08-22	SURVEY	3	N	0	4	3	0	Y	1	0	0	4	3	<3	1	F	N	N
5	4	13.75	863	2018-08-24	C-91BN	1	N	0	5	4	0	Y	1	0	0	5	4	>4	3	M	N	N
6	5	13	1082	2018-08-25	E-91M	2	N	0	6	5	0	Y	1	0	0	6	5	<3	1	F	N	N
7	5	13	1082	2018-08-25	C-91BN	1	Y	1	7	5	10	Y	1	3	3	7	5	3 to 4	2	M	D	Y	CIRCLE BITES
8	5	13	1082	2018-08-25	C-91BN	1	Y	1	8	5	5	Y	1	10	3	8	5	3 to 4	2	No Data	N	N
9	5	13	1082	2018-08-25	SURVEY	3	Y	1	9	5	23	N	0	16	10	9	5	3 to 4	2	F	N	N
10	7	14	960	2018-08-27	C-91BN	1	N	0	10	7	0	Y	1	0	0	10	7	<3	1	No Data	N	N
11	7	14	960	2018-08-27	E-23M	2	Y	1	11	7	30	Y	2	9	10	11	7	3 to 4	2	F	N	N
12	8	36.25	778	2018-08-29	SURVEY	3	Y	1	12	8	4	Y	1	6	0	12	8	<3	1	F	N	N
13	8	36.25	778	2018-08-29	SURVEY	3	Y	1	13	8	5	Y	1	3	2	13	8	<3	1	M	N	N
14	8	36.25	778	2018-08-29	SURVEY	3	N	0	14	8	0	Y	1	0	0	14	8	3 to 4	2	M	N	N
15	8	36.25	778	2018-08-29	SURVEY	3	Y	1	15	8	No Data	Y	1	No Data	No Data	15	8	No Data		No Data	D	Y	CIRCLE BITES
16	9	12.5	891	2018-09-01	SURVEY	3	Y	1	16	9	36	Y	1	3	22	16	9	<3	1	M	N	N
17	9	12.5	891	2018-09-01	E-46M	2	Y	1	17	9	15	No Data	No Data	4	6	17	9	No Data		No Data	D	Y	TAIL ONLY
18	9	12.5	891	2018-09-01	SURVEY	3	Y	1	18	9	57	N	0	44	37	18	9	<3	1	F	N	N
19	10	13	1267	2018-09-02	SURVEY	3	Y	1	19	10	11	No Data	No Data	No Data	No Data	19	10	No Data		No Data	N	N
20	11	14.25	833	2018-09-03	SURVEY	3	Y	1	20	11	7	Y	1	3	22	20	11	<3	1	M	N	N
21	11	14.25	833	2018-09-03	C-91BN	1	Y	1	21	11	2	No Data	No Data	4	6	21	11	No Data		No Data	D	Y	TAIL ONLY
22	11	14.25	833	2018-09-03	SURVEY	3	Y	1	22	11	5	Y	1	44	37	22	11	<3	1	F	N	N
23	11	14.25	833	2018-09-03	C-91BN	1	Y	1	23	11	2	Y	1	6	2	23	11	3 to 4	2	F	N	N
24	11	14.25	833	2018-09-03	E-23M	2	Y	1	24	11	7	Y	1	7	No Data	24	11	>4	3	M	N	N
25	11	14.25	833	2018-09-03	C-91BN	1	Y	1	25	11	3	Y	1	1	1	25	11	>4	3	F	N	N
26	11	14.25	833	2018-09-03	Survey	1	N	0	26	11	0	Y	1	0	0	26	11	3 to 4	2	No Data	N	N
27	11	14.25	833	2018-09-03	SURVEY	3	N	0	27	11	0	Y	1	0	0	27	11	<3	1	F	N	N
28	11	14.25	833	2018-09-03	C-91BN	3	N	0	28	11	0	Y	1	0	0	28	11	No Data		No Data	D	Y	HEAD ONLY
29	11	14.25	833	2018-09-03	SURVEY	3	Y	1	29	11	21	Y	1	8	No Data	29	11	>4	3	M	N	N
30	12	12	1080	2018-09-07	SURVEY	3	Y	1	30	12	33	N	0	8	4	30	12	>4	3	M	N	N
31	12	12	1080	2018-09-07	E-91M	2	Y	1	31	12	13	N	0	4	No Data	31	12	>4	3	M	N	N
32	12	12	1080	2018-09-07	C-91BN	1	Y	1	32	12	12	Y	1	4	3	32	12	3 to 4	2	M	N	N
33	12	12	1080	2018-09-07	SURVEY	3	Y	1	33	12	23	N	0	3	No Data	33	12	3 to 4	2	M	N	N
34	12	12	1080	2018-09-07	C-91BN	1	Y	1	34	12	52	Y	1	79	49	34	12	3 to 4	2	F	N	N
